# Supplementary material for: Role of Cytochrome P450 (CYP)1A in Hyperoxic Lung Injury: Analysis of the Transcriptome and Proteome
Source: PubMed Central journal article supplement (PMC5428698; doi:10.1038/s41598-017-00516-x), 2017-04-04
Supplement: 41598_2017_516_MOESM1_ESM.pdf [file 41598_2017_516_MOESM1_ESM.pdf]

## Supplementary Information

**Title: Role of Cytochrome P450 (CYP)1A in Hyperoxic Lung Injury: Analysis of the Transcriptome and Proteome**

**Authors:** Krithika Lingappan<sup>a</sup>, Suman Maity<sup>b</sup>, Weiwu Jiang<sup>a</sup>, Lihua Wang<sup>a</sup>, Xanthi Couroucli<sup>a</sup>, Alex Weith<sup>a,c</sup>, Guodong Zhou<sup>d</sup>, Cristian Coarfa<sup>b</sup>  
and Bhagavatula Moorthy<sup>a\*</sup>

**Table S1: Up regulated genes across all genotypes (Hyperoxia exposed mice compared to room air controls)**

| <i>WT</i>          |                                              |                    |
|--------------------|----------------------------------------------|--------------------|
| <b>Gene Symbol</b> | <b>Gene Name</b>                             | <b>Fold Change</b> |
| GDF15              | Growth Differentiation Factor 15             | 19.85              |
| NUPR1              | Nuclear Protein 1, Transcriptional Regulator | 13.41              |
| MT1                | Metallothionein 1                            | 12.71              |
| CDKN1A             | Cyclin Dependent Kinase Inhibitor 1A         | 8.01               |
| AKAP12             | A-Kinase Anchoring Protein 12                | 7.10               |
| ANKRD1             | Ankyrin Repeat Domain 1                      | 6.49               |
| TNFRSF12A          | TNF Receptor Superfamily Member 12A          | 6.36               |
| CTGF               | Connective Tissue Growth Factor              | 5.47               |
| GADD45G            | Growth Arrest And DNA Damage Inducible Gamma | 5.47               |
|                    |                                              |                    |
| <i>Cyp1a1-/-</i>   |                                              |                    |
| <b>Gene Symbol</b> | <b>Gene Name</b>                             | <b>Fold Change</b> |
| GDF15              | Growth Differentiation Factor 15             | 18.19              |
| NUPR1              | Nuclear Protein 1, Transcriptional Regulator | 11.31              |
| ANKRD1             | Ankyrin Repeat Domain 1                      | 10.22              |
| CDKN1A             | Cyclin Dependent Kinase Inhibitor 1A         | 6.53               |
| MT1                | Metallothionein 1                            | 5.79               |
| TGM2               | Transglutaminase 2                           | 5.49               |
| TRIB3              | Tribbles Pseudokinase 3                      | 5.26               |
| TNFRSF12A          | TNF Receptor Superfamily Member 12A          | 5.13               |
|                    |                                              |                    |
| <i>Cyp1a2-/-</i>   |                                              |                    |
| <b>Gene Symbol</b> | <b>Gene Name</b>                             | <b>Fold</b>        |

|           |                                                                                                         | <b>Change</b> |
|-----------|---------------------------------------------------------------------------------------------------------|---------------|
| GDF15     | Growth Differentiation Factor 15                                                                        | 18.49         |
| NUPR1     | Nuclear Protein 1, Transcriptional Regulator                                                            | 15.19         |
| ANKRD1    | Ankyrin Repeat Domain 1                                                                                 | 8.63          |
| AREG      | Amphiregulin                                                                                            | 7.72          |
| MT1       | Metallothionein 1                                                                                       | 6.75          |
| TNFRSF12A | TNF Receptor Superfamily Member 12A                                                                     | 5.92          |
| MTHFD2    | Methylenetetrahydrofolate Dehydrogenase (NADP+ Dependent) 2,<br>Methenyltetrahydrofolate Cyclohydrolase | 5.16          |
| ASNS      | Asparagine Synthetase (Glutamine-Hydrolyzing)                                                           | 5.13          |
| CTGF      | Connective Tissue Growth Factor                                                                         | 5.04          |

**Table S2: Down regulated genes across all genotypes (Hyperoxia exposed mice compared to room air controls)**

| <i>WT</i>          |                                         |                    |
|--------------------|-----------------------------------------|--------------------|
| <b>Gene Symbol</b> | <b>Gene Name</b>                        | <b>Fold Change</b> |
| ASAH3L             | N-Acylsphingosine Amidohydrolase 3-Like | 0.26               |
| EAR2               | V-Erba-Related Protein 2                | 0.23               |
| EDNRB              | Endothelin Receptor Type B              | 0.24               |
| FMO1               | Flavin-Containing Monooxygenase         | 0.28               |
| LYZ1               | Lysozyme (Renal Amyloidosis)            | 0.26               |
| MUP2               | Methionine Permease                     | 0.24               |
| TMEM100            | Transmembrane Protein 100               | 0.22               |
| <i>Cyp1a1-/-</i>   |                                         |                    |
| <b>Gene Symbol</b> | <b>Gene Name</b>                        | <b>Fold Change</b> |
| ASAH3L             | N-Acylsphingosine Amidohydrolase 3-Like | 0.28               |
| CXCL12             | C-X-C Motif Chemokine Ligand 12         | 0.29               |
| EAR2               | V-Erba-Related Protein 2                | 0.22               |
| LYZ1               | Lysozyme (Renal Amyloidosis)            | 0.22               |
| MUP2               | Methionine Permease                     | 0.26               |
| TMEM100            | Transmembrane Protein 100               | 0.29               |
| <i>Cyp1a2-/-</i>   |                                         |                    |
| <b>Gene Symbol</b> | <b>Gene Name</b>                        | <b>Fold Change</b> |
| EAR2               | V-Erba-Related Protein 2                | 0.17               |
| EAR3               | V-Erba-Related Protein 3                | 0.20               |

|         |                              |      |
|---------|------------------------------|------|
| LYZ1    | Lysozyme (Renal Amyloidosis) | 0.25 |
| SFTPA1  | Surfactant Protein A1        | 0.26 |
| THBD    | Thrombomodulin               | 0.28 |
| TMEM100 | Transmembrane Protein 100    | 0.19 |

**Table S4: Down regulated genes in Room Air (WT vs. *Cyp1a1*<sup>-/-</sup> and WT vs. *Cyp1a2*<sup>-/-</sup>)**

| <i>Cyp1a1</i> <sup>-/-</sup> vs. WT |                                               |             |
|-------------------------------------|-----------------------------------------------|-------------|
| Gene Symbol                         | Gene Name                                     | Fold Change |
| CBX1                                | Chromobox 1                                   | 0.19        |
| CD200                               | CD200                                         | 0.28        |
| RPL29                               | Ribosomal protein L29                         | 0.29        |
| NNMT                                | Nicotinamide N-methyltransferase              | 0.34        |
| EPM2AIP1                            | EPM2A (laforin) interacting protein 1         | 0.40        |
| MELA                                | Melanoma antigen                              | 0.54        |
| ATG3                                | Autophagy related 3                           | 0.55        |
| CLASRP                              | CLK4-associating serine/arginine rich protein | 0.55        |
| WDR82                               | WD repeat domain containing 82                | 0.55        |
| CD59                                | CD59                                          | 0.55        |
| <i>Cyp1a2</i> <sup>-/-</sup> vs. WT |                                               |             |
| Gene Symbol                         | Gene Name                                     | Fold Change |
| MUP2                                | Major urinary protein 2                       | 0.26        |
| MUP3                                | Major urinary protein 3                       | 0.38        |
| TTR                                 | Transthyretin                                 | 0.47        |
| MUP5                                | Major urinary protein 5                       | 0.48        |
| APOA                                | Apolipoprotein A-II                           | 0.51        |
| RHBDL2                              | Rhomboid, veinlet-like 2                      | 0.52        |
| ACTC1                               | Actin, alpha, cardiac muscle 1                | 0.54        |
| KLF2                                | Kruppel like factor 2                         | 0.58        |
| MT-ND5                              | NADH dehydrogenase 5, mitochondrial           | 0.59        |

**Table S3: Up regulated genes in Room Air (WT vs. *Cyp1a1*<sup>-/-</sup> and WT vs. *Cyp1a2*<sup>-/-</sup>)**

| <i>Cyp1a1</i> <sup>-/-</sup> vs. WT |                                                             |             |
|-------------------------------------|-------------------------------------------------------------|-------------|
| Gene Symbol                         | Gene Name                                                   | Fold Change |
| ERDR1                               | Erythroid Differentiation Regulator 1                       | 3.21        |
| PGLYRP1                             | Peptidoglycan recognition protein 1                         | 2.4         |
| ADAT2                               | Adenosine deaminase, tRNA specific 2                        | 1.89        |
| SORL1                               | Sortilin related receptor 1                                 | 1.75        |
| Rpl29-ps2                           | Ribosomal protein L29, pseudogene 2                         | 1.62        |
| SLC27A6                             | Solute carrier family 27 (fatty acid transporter), member 6 | 1.53        |
| HSPA8                               | Heat shock protein 8                                        | 1.78        |
| KLF2                                | Kruppel-like factor 2                                       | 1.65        |
| IL18                                | Interleukin-18                                              | 1.58        |
|                                     |                                                             |             |
| <i>Cyp1a2</i> <sup>-/-</sup> vs. WT |                                                             |             |
| Gene Symbol                         | Gene Name                                                   | Fold Change |
| MAP3K6                              | Mitogen-activated protein kinase kinase kinase 6            | 2.32        |
| KLF9                                | Kruppel-like factor 9                                       | 2.14        |
| ANGPTL4                             | Angiopoietin-like 4                                         | 2.05        |
| FKBP5                               | FK506 binding protein 5                                     | 2.01        |
| FAM107A                             | Family with sequence similarity 107, member A               | 1.93        |
| NPR3                                | Natriuretic peptide receptor 3                              | 1.92        |
| EAR3                                | Eosinophil-associated, ribonuclease A family, member 3      | 1.87        |
| SPARC                               | Secreted acidic cysteine rich glycoprotein                  | 1.85        |
| LPL                                 | Lipoprotein lipase                                          | 1.82        |

Figure S1

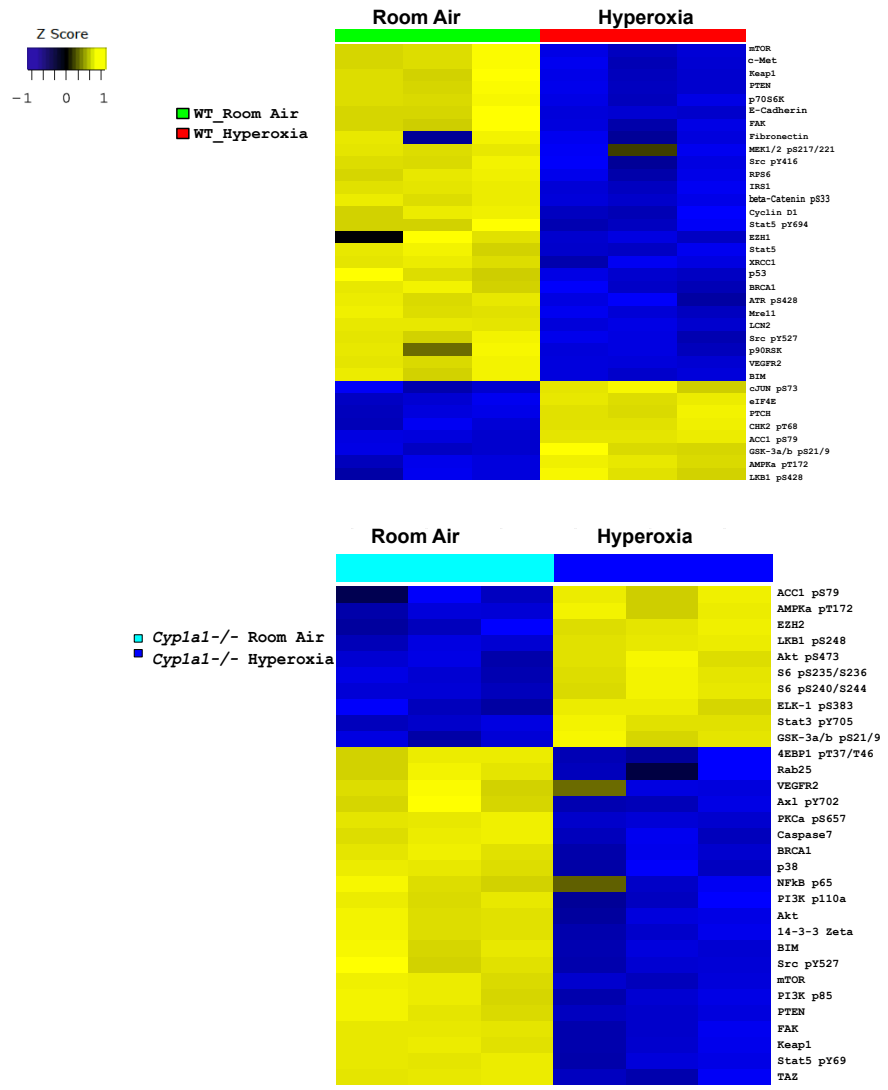

**Figure S1. Hyperoxia-exposed *WT* and *Cyp1a1*<sup>-/-</sup> mice are characterized by robust and distinct proteomic changes compared to room air controls.** Reverse Phase Protein Analysis (RPPA) was used to generate proteomic profiles of *WT* and *Cyp1a1*<sup>-/-</sup> mice exposed to hyperoxia. Differential protein expression was evaluated using parametric t-test (significance for *fdr*-adjusted *q*-value<0.25). Proteomic changes of hyperoxia exposed mice compared to room air controls in *WT* and *Cyp1a1*<sup>-/-</sup> mice.



Table S5: RPPA profile of differentially expressed proteins in the lung after exposure to hyperoxia in *Cyp1a1*<sup>-/-</sup> and *Cyp1a2*<sup>-/-</sup> compared to WT mice

| Antibody        | Gene Symbol  | <i>Cyp1a1</i> <sup>-/-</sup> over WT fold change | <i>Cyp1a1</i> <sup>-/-</sup> over WT p-value | <i>Cyp1a1</i> <sup>-/-</sup> over WT fdr-adjusted q-value | Antibody      | Gene Symbol | <i>Cyp1a2</i> <sup>-/-</sup> over WT fold change | <i>Cyp1a2</i> <sup>-/-</sup> over WT p-value | <i>Cyp1a2</i> <sup>-/-</sup> over WT fdr-adjusted q-value |
|-----------------|--------------|--------------------------------------------------|----------------------------------------------|-----------------------------------------------------------|---------------|-------------|--------------------------------------------------|----------------------------------------------|-----------------------------------------------------------|
| AMPKa pT172     | PRKAA1       | 0.65                                             | 0.01                                         | 0.08                                                      | c-Raf         | RAF1        | 0.73                                             | 0.00                                         | 0.10                                                      |
| GSK-3a/b pS21/9 | GSK3A, GSK3B | 0.65                                             | 0.03                                         | 0.18                                                      | Stat5         | STAT5       | 0.74                                             | 0.00                                         | 0.10                                                      |
| CHK2 pT68       | CHEK2        | 0.68                                             | 0.00                                         | 0.01                                                      | IGF1R         | IGF1R       | 0.79                                             | 0.01                                         | 0.15                                                      |
| ELK-1 pS383     | ELK1         | 0.72                                             | 0.01                                         | 0.08                                                      | ACC1          | ACACA       | 0.81                                             | 0.00                                         | 0.10                                                      |
| PTCH            | PTCH1        | 0.74                                             | 0.01                                         | 0.07                                                      | mTOR          | FRAP1       | 0.85                                             | 0.01                                         | 0.13                                                      |
| Stat3 pY705     | STAT3        | 0.74                                             | 0.03                                         | 0.18                                                      | VEGFR2        | KDR         | 0.88                                             | 0.01                                         | 0.15                                                      |
| LKB1 pS428      | STK11        | 0.75                                             | 0.00                                         | 0.01                                                      | Bcl-xl        | BCL2L1      | 1.27                                             | 0.00                                         | 0.10                                                      |
| eIF4E           | EIF4E        | 0.87                                             | 0.00                                         | 0.01                                                      | p70S6K pT389  | RPS6KB1     | 1.34                                             | 0.01                                         | 0.15                                                      |
| Bcl-xl          | BCL2L1       | 0.89                                             | 0.03                                         | 0.18                                                      | Stat3 pY705   | STAT3       | 1.43                                             | 0.00                                         | 0.13                                                      |
| Stat5 pY694     | STAT5        | 1.07                                             | 0.06                                         | 0.25                                                      | S6 pS240/S244 | RPS6        | 1.58                                             | 0.02                                         | 0.23                                                      |
| GSK3B           | GSK3B        | 1.14                                             | 0.05                                         | 0.23                                                      |               |             |                                                  |                                              |                                                           |
| PI3K p110a      | PIK3CA       | 1.14                                             | 0.01                                         | 0.08                                                      |               |             |                                                  |                                              |                                                           |
| p38             | MAPK14       | 1.15                                             | 0.01                                         | 0.10                                                      |               |             |                                                  |                                              |                                                           |
| E-Cadherin      | CDH1         | 1.15                                             | 0.00                                         | 0.02                                                      |               |             |                                                  |                                              |                                                           |
| PI3K p85        | PIK3R1       | 1.19                                             | 0.00                                         | 0.04                                                      |               |             |                                                  |                                              |                                                           |
| Src pY527       | SRC          | 1.23                                             | 0.01                                         | 0.10                                                      |               |             |                                                  |                                              |                                                           |
| 4EBP1 pT37/T46  | EIF4EBP1     | 1.25                                             | 0.03                                         | 0.16                                                      |               |             |                                                  |                                              |                                                           |
| p70S6K          | RPS6KB1      | 1.26                                             | 0.01                                         | 0.10                                                      |               |             |                                                  |                                              |                                                           |
| c-Met           | MET          | 1.29                                             | 0.05                                         | 0.23                                                      |               |             |                                                  |                                              |                                                           |
| ACC1            | ACACA        | 1.31                                             | 0.04                                         | 0.19                                                      |               |             |                                                  |                                              |                                                           |

|                      |        |      |      |      |  |  |  |  |  |
|----------------------|--------|------|------|------|--|--|--|--|--|
| EGFR pY1173          | EGFR   | 1.32 | 0.05 | 0.23 |  |  |  |  |  |
| mTOR                 | FRAP1  | 1.32 | 0.00 | 0.01 |  |  |  |  |  |
| Keap1                | KEAP1  | 1.32 | 0.00 | 0.01 |  |  |  |  |  |
| PKCa                 | PRKCA  | 1.33 | 0.02 | 0.12 |  |  |  |  |  |
| 14-3-3 Zeta          | YWHAZ  | 1.39 | 0.00 | 0.05 |  |  |  |  |  |
| beta-Catenin<br>pS33 | CTNNB1 | 1.40 | 0.02 | 0.10 |  |  |  |  |  |
| PKCa pS657           | PRKCA  | 1.45 | 0.00 | 0.02 |  |  |  |  |  |
| VEGFR2               | KDR    | 1.62 | 0.01 | 0.08 |  |  |  |  |  |
| BRCA1                | BRCA1  | 1.68 | 0.00 | 0.04 |  |  |  |  |  |
| PTEN                 | PTEN   | 1.71 | 0.00 | 0.01 |  |  |  |  |  |
| LCN2                 | LCN2   | 1.85 | 0.05 | 0.23 |  |  |  |  |  |
| Mre11                | MRE11A | 2.04 | 0.00 | 0.04 |  |  |  |  |  |

Table S6: RPPA profile of differentially expressed proteins in the lung after exposure in WT and *Cyp1a1*<sup>-/-</sup> mice after exposure to hyperoxia compared to room air (RA) controls.

| Antibody          | Gene Symbol | WT O <sub>2</sub> over WT RA fold change | WT O <sub>2</sub> over WT RA p-value | WT O <sub>2</sub> over WT RA fdr-adjusted q-value | Antibody       | Gene Symbol    | <i>Cyp1a1</i> <sup>-/-</sup> O <sub>2</sub> over <i>Cyp1a1</i> <sup>-/-</sup> RA fold change | <i>Cyp1a1</i> <sup>-/-</sup> O <sub>2</sub> over <i>Cyp1a1</i> <sup>-/-</sup> RA p-value | <i>Cyp1a1</i> <sup>-/-</sup> O <sub>2</sub> over <i>Cyp1a1</i> <sup>-/-</sup> RA fdr-adjusted q-value |
|-------------------|-------------|------------------------------------------|--------------------------------------|---------------------------------------------------|----------------|----------------|----------------------------------------------------------------------------------------------|------------------------------------------------------------------------------------------|-------------------------------------------------------------------------------------------------------|
| LCN2              | LCN2        | 0.45                                     | 0.00                                 | 0.057                                             | Caspase7       | CASP7          | 0.63                                                                                         | 0.01                                                                                     | 0.091                                                                                                 |
| Mre11             | MRE11A      | 0.47                                     | 0.00                                 | 0.058                                             | BIM            | BCL2L11        | 0.75                                                                                         | 0.01                                                                                     | 0.117                                                                                                 |
| VEGFR2            | KDR         | 0.65                                     | 0.01                                 | 0.125                                             | BRCA1          | BRCA1          | 0.77                                                                                         | 0.01                                                                                     | 0.091                                                                                                 |
| PTEN              | PTEN        | 0.72                                     | 0.02                                 | 0.141                                             | PKCa pS657     | PRKCA          | 0.79                                                                                         | 0.00                                                                                     | 0.059                                                                                                 |
| BRCA1             | BRCA1       | 0.72                                     | 0.02                                 | 0.131                                             | Stat5 pY694    | STAT5          | 0.80                                                                                         | 0.01                                                                                     | 0.117                                                                                                 |
| c-Met             | MET         | 0.76                                     | 0.02                                 | 0.133                                             | PTEN           | PTEN           | 0.81                                                                                         | 0.01                                                                                     | 0.091                                                                                                 |
| Src pY416         | SRC         | 0.77                                     | 0.03                                 | 0.191                                             | Keap1          | KEAP1          | 0.82                                                                                         | 0.01                                                                                     | 0.091                                                                                                 |
| p70S6K            | RPS6KB1     | 0.77                                     | 0.01                                 | 0.122                                             | VEGFR2         | KDR            | 0.83                                                                                         | 0.04                                                                                     | 0.226                                                                                                 |
| E-Cadherin        | CDH1        | 0.77                                     | 0.06                                 | 0.247                                             | p38            | MAPK14         | 0.84                                                                                         | 0.02                                                                                     | 0.159                                                                                                 |
| beta-Catenin pS33 | CTNNB1      | 0.79                                     | 0.00                                 | 0.034                                             | Akt            | AKT1 AKT2 AKT3 | 0.85                                                                                         | 0.01                                                                                     | 0.117                                                                                                 |
| p53               | TP53        | 0.79                                     | 0.05                                 | 0.231                                             | 14-3-3 Zeta    | YWHAZ          | 0.85                                                                                         | 0.01                                                                                     | 0.091                                                                                                 |
| Src pY527         | SRC         | 0.79                                     | 0.01                                 | 0.122                                             | 4EBP1 pT37/T46 | EIF4EBP1       | 0.85                                                                                         | 0.04                                                                                     | 0.226                                                                                                 |
| BIM               | BCL2L11     | 0.81                                     | 0.03                                 | 0.162                                             | Src pY527      | SRC            | 0.86                                                                                         | 0.04                                                                                     | 0.226                                                                                                 |
| Stat5             | STAT5       | 0.81                                     | 0.01                                 | 0.125                                             | Axl pY702      | AXL            | 0.87                                                                                         | 0.05                                                                                     | 0.244                                                                                                 |
| Keap1             | KEAP1       | 0.83                                     | 0.04                                 | 0.191                                             | PI3K p85       | PIK3R1         | 0.88                                                                                         | 0.01                                                                                     | 0.091                                                                                                 |
| mTOR              | FRAP1       | 0.83                                     | 0.03                                 | 0.162                                             | FAK            | PTK2           | 0.88                                                                                         | 0.02                                                                                     | 0.147                                                                                                 |
| RPS6              | RPS6        | 0.84                                     | 0.01                                 | 0.122                                             | mTOR           | FRAP1          | 0.90                                                                                         | 0.01                                                                                     | 0.091                                                                                                 |
| XRCC1             | XRCC1       | 0.84                                     | 0.01                                 | 0.122                                             | PI3K p110a     | PIK3CA         | 0.90                                                                                         | 0.05                                                                                     | 0.226                                                                                                 |

|                  |              |      |      |       |                 |                   |      |      |       |
|------------------|--------------|------|------|-------|-----------------|-------------------|------|------|-------|
| p90RSK           | RPS6KA1      | 0.87 | 0.04 | 0.197 | NFkB p65        | NFKB              | 0.93 | 0.05 | 0.235 |
| IRS1             | IRS1         | 0.88 | 0.01 | 0.106 | TAZ             | WWTR1             | 0.93 | 0.02 | 0.153 |
| ATR pS428        | ATR          | 0.88 | 0.03 | 0.162 | Rab25           | RAB25             | 0.94 | 0.05 | 0.228 |
| Fibronectin      | FN1          | 0.89 | 0.05 | 0.243 | EZH2            | EZH2              | 1.09 | 0.04 | 0.226 |
| Cyclin D1        | CCND1        | 0.89 | 0.02 | 0.131 | ELK-1 pS383     | ELK1              | 1.17 | 0.03 | 0.159 |
| FAK              | PTK2         | 0.90 | 0.06 | 0.247 | ACC1 pS79       | ACACA ACACB       | 1.22 | 0.05 | 0.226 |
| Stat5 pY694      | STAT5        | 0.90 | 0.06 | 0.247 | GSK-3a/b pS21/9 | GSK3A, GSK3B      | 1.22 | 0.01 | 0.112 |
| EZH2             | EZH2         | 0.92 | 0.06 | 0.247 | LKB1 pS428      | STK11             | 1.23 | 0.00 | 0.078 |
| MEK1/2 pS217/221 | MAP2K1       | 0.93 | 0.06 | 0.247 | Stat3 pY705     | STAT3             | 1.32 | 0.00 | 0.091 |
| LKB1 pS428       | STK11        | 1.10 | 0.02 | 0.161 | Akt.pS473       | AKT1 AKT2<br>AKT3 | 1.39 | 0.01 | 0.091 |
| eIF4E            | EIF4E        | 1.14 | 0.00 | 0.057 | AMPKa pT172     | PRKAA1            | 1.56 | 0.02 | 0.149 |
| cJUN pS73        | JUN          | 1.23 | 0.03 | 0.171 | S6 pS235/S236   | RPS6              | 1.67 | 0.00 | 0.091 |
| PTCH             | PTCH1        | 1.26 | 0.01 | 0.089 | S6 pS240/S244   | RPS6              | 2.10 | 0.01 | 0.091 |
| CHK2 pT68        | CHEK2        | 1.31 | 0.00 | 0.089 |                 |                   |      |      |       |
| GSK-3a/b pS21/9  | GSK3A, GSK3B | 1.40 | 0.05 | 0.231 |                 |                   |      |      |       |
| AMPKa pT172      | PRKAA1       | 2.14 | 0.00 | 0.061 |                 |                   |      |      |       |
| ACC1 pS79        | ACACA ACACB  | 2.22 | 0.00 | 0.006 |                 |                   |      |      |       |

Table S7: Primer List

|    | <b>Gene Symbol</b> | <b>Gene name</b>                                 | <b>Identifier</b> |
|----|--------------------|--------------------------------------------------|-------------------|
| 1  | Ankrd1             | Ankyrin repeat domain 1                          | Mm00496512_m1     |
| 2  | Gdf15              | Growth differentiation factor 15                 | Mm00442228_m1     |
| 3  | Nupr1              | Nuclear protein transcription regulator 1        | Mm00498104_m1     |
| 4  | Areg               | Amphiegulin                                      | Mm01354339-m1     |
| 5  | P21(Trp63)         | Transformation protein63                         | Mm00495793-m1     |
| 6  | CTGF               | Connective tissue growth factor                  | Mm01192933-g1     |
| 7  | Hmox1              | Heme oxygenase1                                  | Mm00516005-m1     |
| 8  | Dusp1              | dual specificity phosph                          | Mm00457274-g1     |
| 9  | Slc2a3             | solute carrier family2 member3                   | Mm00441483-m1     |
| 10 | Nme1               | Nucleoside diphosphate kines1                    | Mm01612215-m1     |
| 11 | PCNA               | Proliferating cell nuclear antigen               | Mm00448100-g1     |
| 12 | XPC                | Xeroderma pigmentosum complementation groupC     | Mm01183434-m1     |
| 13 | CD63               | CD63 antigen                                     | Mm01966817-g1     |
| 14 | Abca1              | ATP-binding cassette sub-family A (ABC1),member1 | Mm00442646-m1     |
